# Supplementary material
Source: publisher figshare collection journal article supplement (https://acs.figshare.com/ndownloader/files/17417756)
Supplement: Supplementary file 1 [file 17417756]

Compound_ID	SMILES	DENV-1 Rep cell (µM)	DENV-2 Rep cell (µM)	DENV-3 Rep cell (µM)	DENV-4 Rep cell (µM)	CC50 (µM; NGC reporter on Huh7 cell)
1a	O=C1NC2=CC=C(Cl)C=C2[C@]13C(N=NN4[C@H](C5=CC=C(Cl)C=C5)C)=C4NC(C3)=O	>5.0	0.039	0.01	>5.0	>10
7	O=C1N(C)C2=CC=C(Cl)C=C2[C@]13C(N=NN4[C@H](C5=CC=C(Cl)C=C5)C)=C4NC(C3)=O	>5.0	0.019	0.004	>5.0	>10
8	O=C1N(CC)C2=CC=C(Cl)C=C2[C@]13C(N=NN4[C@H](C5=CC=C(Cl)C=C5)C)=C4NC(C3)=O	2.5	0.024	0.006	>5.0	>10
9	O=C1N(CCC)C2=CC=C(Cl)C=C2[C@]13C(N=NN4[C@H](C5=CC=C(Cl)C=C5)C)=C4NC(C3)=O	1.9	0.071	0.01	>5.0	>10
10	O=C1N(CCCC)C2=CC=C(Cl)C=C2[C@]13C(N=NN4[C@H](C5=CC=C(Cl)C=C5)C)=C4NC(C3)=O	1.3	0.075	0.018	>5.0	>10
11	O=C1N(CCCCCC)C2=CC=C(Cl)C=C2[C@]13C(N=NN4[C@H](C5=CC=C(Cl)C=C5)C)=C4NC(C3)=O	0.83	0.81	0.14	>5.0	>10
12	O=C1N(CCCCCCCCCC)C2=CC=C(Cl)C=C2[C@]13C(N=NN4[C@H](C5=CC=C(Cl)C=C5)C)=C4NC(C3)=O	3.4	>10	1.2	7.3	>10
13	O=C1N(C(C)C)C2=CC=C(Cl)C=C2[C@]13C(N=NN4[C@H](C5=CC=C(Cl)C=C5)C)=C4NC(C3)=O	5.7	0.023	0.009	>5.0	>10
14	O=C1N(CC(C)C)C2=CC=C(Cl)C=C2[C@]13C(N=NN4[C@H](C5=CC=C(Cl)C=C5)C)=C4NC(C3)=O	1.3	0.15	0.02	>5.0	>10
15	O=C1N(CCC(C)C)C2=CC=C(Cl)C=C2[C@]13C(N=NN4[C@H](C5=CC=C(Cl)C=C5)C)=C4NC(C3)=O	0.78	0.16	0.035	>5.0	>10
16	O=C1N(CCC(C)(C)C)C2=CC=C(Cl)C=C2[C@]13C(N=NN4[C@H](C5=CC=C(Cl)C=C5)C)=C4NC(C3)=O	1.1	0.87	0.082	3.9	>10
17	O=C1N(CC2CC2)C3=CC=C(Cl)C=C3[C@]14C(N=NN5[C@H](C6=CC=C(Cl)C=C6)C)=C5NC(C4)=O	3.1	0.11	0.017	>5.0	>10
18	O=C1N(CC=C)C2=CC=C(Cl)C=C2[C@]13C(N=NN4[C@H](C5=CC=C(Cl)C=C5)C)=C4NC(C3)=O	2.1	0.038	0.005	>5.0	>10
19	O=C1N(CC#C)C2=CC=C(Cl)C=C2[C@]13C(N=NN4[C@H](C5=CC=C(Cl)C=C5)C)=C4NC(C3)=O	>5.0	0.069	0.003	>5.0	>10
20	O=C1N(CC#CC)C2=CC=C(Cl)C=C2[C@]13C(N=NN4[C@H](C5=CC=C(Cl)C=C5)C)=C4NC(C3)=O	>5.0	0.063	0.02	>5.0	>10
21	O=C1NC2=CC=C(Cl)C=C2[C@]13C(N=NN4[C@H](C5=CC=C(Cl)C=C5)C)=C4N(C(C)C)C(C3)=O	2.1	0.86	0.31	4.4	>10
22	O=C1N(C(C)C)C2=CC=C(Cl)C=C2[C@]13C(N=NN4[C@H](C5=CC=C(Cl)C=C5)C)=C4N(C(C)C)C(C3)=O	3.8	>10	1.5	3	>10
23	O=C1N(C)C2=CC=C(Cl)C=C2[C@]13C(N=NN4[C@H](C5=CC=C(Cl)C=C5)C)=C4N(C)C(C3(C)C)=O	>5.0	>5.0	>5.0	>5.0	>10
24	O=C1N(CC2=CC=CC=C2)C3=CC=C(Cl)C=C3[C@]14C(N=NN5[C@H](C6=CC=C(Cl)C=C6)C)=C5NC(C4)=O	2	0.15	0.02	>5.0	>10
25	O=C1N(CC2=CC=C(F)C=C2)C3=CC=C(Cl)C=C3[C@]14C(N=NN5[C@H](C6=CC=C(Cl)C=C6)C)=C5NC(C4)=O	5	0.16	0.048	10	>10
26	O=C1N(CC2=CC(F)=CC=C2)C3=CC=C(Cl)C=C3[C@]14C(N=NN5[C@H](C6=CC=C(Cl)C=C6)C)=C5NC(C4)=O	10	0.29	0.051	>5.0	>10
27	O=C1N(CC2=CC=C(Cl)C=C2)C3=CC=C(Cl)C=C3[C@]14C(N=NN5[C@H](C6=CC=C(Cl)C=C6)C)=C5NC(C4)=O	2.2	3.3	0.2	6.5	>10
28	O=C1N(CC2=CC=C(Cl)C(F)=C2)C3=CC=C(Cl)C=C3[C@]14C(N=NN5[C@H](C6=CC=C(Cl)C=C6)C)=C5NC(C4)=O	1.5	4	0.29	5.1	>10
29	O=C1N(CC2=CC=CC(OC)=C2)C3=CC=C(Cl)C=C3[C@]14C(N=NN5[C@H](C6=CC=C(Cl)C=C6)C)=C5NC(C4)=O	2.6	0.83	0.087	6.2	>10
30	O=C1N(CC2=CC(OC)=CC(OC)=C2)C3=CC=C(Cl)C=C3[C@]14C(N=NN5[C@H](C6=CC=C(Cl)C=C6)C)=C5NC(C4)=O	3.4	3.1	0.79	7.4	>10
31	O=C1N(CC2=CC(C(C)(C)C)=CC(C(C)(C)C)=C2)C3=CC=C(Cl)C=C3[C@]14C(N=NN5[C@H](C6=CC=C(Cl)C=C6)C)=C5NC(C4)=O	4.6	>10	5.9	4.9	>10
32	O=C1N(CCC2=CC=CC=C2)C3=CC=C(Cl)C=C3[C@]14C(N=NN5[C@H](C6=CC=C(Cl)C=C6)C)=C5NC(C4)=O	1.1	0.6	0.19	>5.0	>10
33	O=C1N(CC2=CC=CC=N2)C3=CC=C(Cl)C=C3[C@]14C(N=NN5[C@H](C6=CC=C(Cl)C=C6)C)=C5NC(C4)=O	>5.0	0.02	0.003	>5.0	>10
34	O=C1N(CC2=CN=CC=C2)C3=CC=C(Cl)C=C3[C@]14C(N=NN5[C@H](C6=CC=C(Cl)C=C6)C)=C5NC(C4)=O	3.2	0.029	0.021	>5.0	>10
35	O=C1N(CC2=CC=NC=C2)C3=CC=C(Cl)C=C3[C@]14C(N=NN5[C@H](C6=CC=C(Cl)C=C6)C)=C5NC(C4)=O	>5.0	0.072	0.025	>5.0	>10
36	O=C1N(CC2=CN=C(Cl)C=C2)C3=CC=C(Cl)C=C3[C@]14C(N=NN5[C@H](C6=CC=C(Cl)C=C6)C)=C5NC(C4)=O	>5.0	0.078	0.006	>5.0	>10
37	O=C1N(CC2=CN=C(C)C=C2)C3=CC=C(Cl)C=C3[C@]14C(N=NN5[C@H](C6=CC=C(Cl)C=C6)C)=C5NC(C4)=O	>5.0	0.15	0.011	>5.0	>10
38	O=C1N(CCOCOC)C2=CC=C(Cl)C=C2[C@]13C(N=NN4[C@H](C5=CC=C(Cl)C=C5)C)=C4NC(C3)=O	>5.0	0.092	0.019	>5.0	>10
39	O=C1N(CCCOC)C2=CC=C(Cl)C=C2[C@]13C(N=NN4[C@H](C5=CC=C(Cl)C=C5)C)=C4NC(C3)=O	>5.0	0.04	0.009	>5.0	>10
40	O=C1NC2=CC=C(Cl)C=C2[C@]13C(N=NN4[C@H](C5=CC=C(Cl)C=C5)C)=C4N(CCCOC)C(C3)=O	>10	8.7	0.91	>10	>10
41	O=C1N(CC(OCC)OCC)C2=CC=C(Cl)C=C2[C@]13C(N=NN4[C@H](C5=CC=C(Cl)C=C5)C)=C4NC(C3)=O	>5.0	0.29	0.076	>5.0	>10
42	O=C1N(CCO)C2=CC=C(Cl)C=C2[C@]13C(N=NN4[C@H](C5=CC=C(Cl)C=C5)C)=C4NC(C3)=O	>5.0	0.037	0.01	>5.0	>10
43	O=C1N(CC(OC)=O)C2=CC=C(Cl)C=C2[C@]13C(N=NN4[C@H](C5=CC=C(Cl)C=C5)C)=C4NC(C3)=O	>5.0	0.077	0.011	>5.0	>10
44	O=C1NC2=CC=C(Cl)C=C2[C@]13C(N=NN4[C@H](C5=CC=C(Cl)C=C5)C)=C4N(CC(OC)=O)C(C3)=O	>10	>10	2.7	>10	>10
45	O=C1N(CC(O)=O)C2=CC=C(Cl)C=C2[C@]13C(N=NN4[C@H](C5=CC=C(Cl)C=C5)C)=C4NC(C3)=O		2.4			>10
46	O=C1N(CCF)C2=CC=C(Cl)C=C2[C@]13C(N=NN4[C@H](C5=CC=C(Cl)C=C5)C)=C4NC(C3)=O	>5.0	0.038	0.009	>5.0	>10
47	O=C1N(CCCBr)C2=CC=C(Cl)C=C2[C@]13C(N=NN4[C@H](C5=CC=C(Cl)C=C5)C)=C4NC(C3)=O	2.4	0.25	0.076	3.2	>10
48	O=C1N(CCCCCl)C2=CC=C(Cl)C=C2[C@]13C(N=NN4[C@H](C5=CC=C(Cl)C=C5)C)=C4NC(C3)=O	>5.0	0.073	0.019	>5.0	>10
49	O=C1N(CCCCCCBr)C2=CC=C(Cl)C=C2[C@]13C(N=NN4[C@H](C5=CC=C(Cl)C=C5)C)=C4NC(C3)=O		3			>10
50	O=C1N(CCCCCCCCBr)C2=CC=C(Cl)C=C2[C@]13C(N=NN4[C@H](C5=CC=C(Cl)C=C5)C)=C4NC(C3)=O		>5.0			>10
55	O=C1N(CCN2CCOCC2)C3=CC=C(Cl)C=C3[C@]14C(N=NN5[C@H](C6=CC=C(Cl)C=C6)C)=C5NC(C4)=O	>5.0	0.075	0.017	>5.0	>10
56	O=C1N(CCN2CCCCC2)C3=CC=C(Cl)C=C3[C@]14C(N=NN5[C@H](C6=CC=C(Cl)C=C6)C)=C5NC(C4)=O	>5.0	0.074	0.005	>5.0	>10
57	O=C1N(CCN(C)C)C2=CC=C(Cl)C=C2[C@]13C(N=NN4[C@H](C5=CC=C(Cl)C=C5)C)=C4NC(C3)=O	>5.0	0.025	0.002	>5.0	>10
58	O=C1N(CCN2CCCC2)C3=CC=C(Cl)C=C3[C@]14C(N=NN5[C@H](C6=CC=C(Cl)C=C6)C)=C5NC(C4)=O	>5.0	0.038	0.006	>5.0	>10
59	O=C1N(CCN2CCN(C)CC2)C3=CC=C(Cl)C=C3[C@]14C(N=NN5[C@H](C6=CC=C(Cl)C=C6)C)=C5NC(C4)=O	>5.0	0.3	0.03	>5.0	>10
60	O=C1N(CCN(CCS(C)(=O)=O)C)C2=CC=C(Cl)C=C2[C@]13C(N=NN4[C@H](C5=CC=C(Cl)C=C5)C)=C4NC(C3)=O	>5.0	0.077	0.018	>5.0	>10
61	O=C1N(CCN2CCC2)C3=CC=C(Cl)C=C3[C@]14C(N=NN5[C@H](C6=CC=C(Cl)C=C6)C)=C5NC(C4)=O	>5.0	0.067	0.007	>5.0	>10
62	O=C1N(CCNC)C2=CC=C(Cl)C=C2[C@]13C(N=NN4[C@H](C5=CC=C(Cl)C=C5)C)=C4NC(C3)=O	>5.0	0.12	0.022	>5.0	>10
63	O=C1N(CCCN(C)C)C2=CC=C(Cl)C=C2[C@]13C(N=NN4[C@H](C5=CC=C(Cl)C=C5)C)=C4NC(C3)=O	>5.0	0.025	0.001	>5.0	>10
64	O=C1N(CCCN2CCCCC2)C3=CC=C(Cl)C=C3[C@]14C(N=NN5[C@H](C6=CC=C(Cl)C=C6)C)=C5NC(C4)=O	>5.0	0.13	0.012	>5.0	>10
65	O=C1N(CCCN2CCOCC2)C3=CC=C(Cl)C=C3[C@]14C(N=NN5[C@H](C6=CC=C(Cl)C=C6)C)=C5NC(C4)=O	>5.0	0.076	0.005	>5.0	>10
66	O=C1N(CCCCN(C)C)C2=CC=C(Cl)C=C2[C@]13C(N=NN4[C@H](C5=CC=C(Cl)C=C5)C)=C4NC(C3)=O	>5.0	0.19	0.038	>5.0	>10
67	O=C1N(CCCCN2CCOCC2)C3=CC=C(Cl)C=C3[C@]14C(N=NN5[C@H](C6=CC=C(Cl)C=C6)C)=C5NC(C4)=O	>5.0	0.35	0.078	>5.0	>10
68	O=C1N(CCCCCCN(C)C)C2=CC=C(Cl)C=C2[C@]13C(N=NN4[C@H](C5=CC=C(Cl)C=C5)C)=C4NC(C3)=O	1.5	0.9	0.066	>5.0	>10
69	O=C1N(CCCCCCCCN(C)C)C2=CC=C(Cl)C=C2[C@]13C(N=NN4[C@H](C5=CC=C(Cl)C=C5)C)=C4NC(C3)=O	>5.0	0.49	0.042	>5.0	>10
70	O=C1N(CCCCCCCCCCN(C)C)C2=CC=C(Cl)C=C2[C@]13C(N=NN4[C@H](C5=CC=C(Cl)C=C5)C)=C4NC(C3)=O	2.7	3.5	0.098	3.5	>10
73	O=C1N(CCOC(CCCCCCCNC(CCCC[C@@H]2SC[C@@](N3)([H])[C@]2([H])NC3=O)=O)=O)C4=CC=C(Cl)C=C4[C@]15C(N=NN6[C@H](C7=CC=C(Cl)C=C7)C)=C6NC(C5)=O		0.041	0.017		>10
75	O=C1N(CCOC(CCCCCCCNC(CCCC[C@@H]2SC[C@@](N3)([H])[C@]2([H])NC3=O)=O)=O)C4=CC=C(Cl)C=C4[C@@]15C(N=NN6[C@H](C7=CC=C(Cl)C=C7)C)=C6NC(C5)=O		>5.0	>5.0		>10
